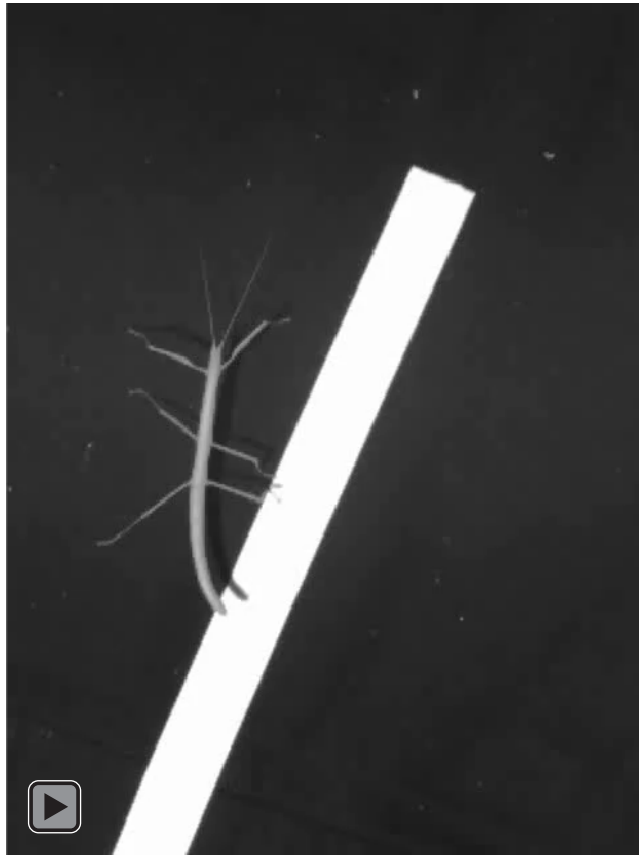

**Movie 1.** An example of an intact adult stick insect walking in a tetrapod gait.

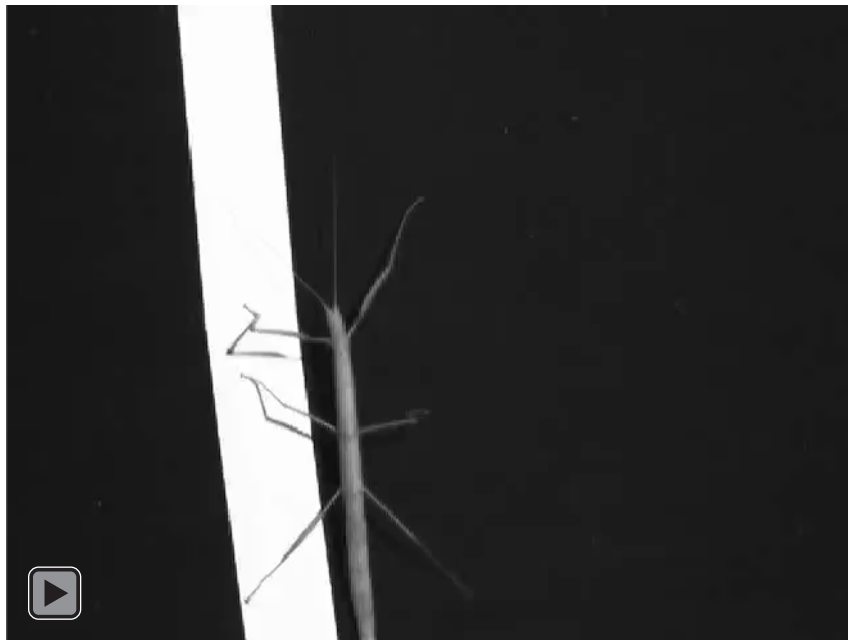

**Movie 2.** An example of an intact adult stick insect walking in a tripod gait.

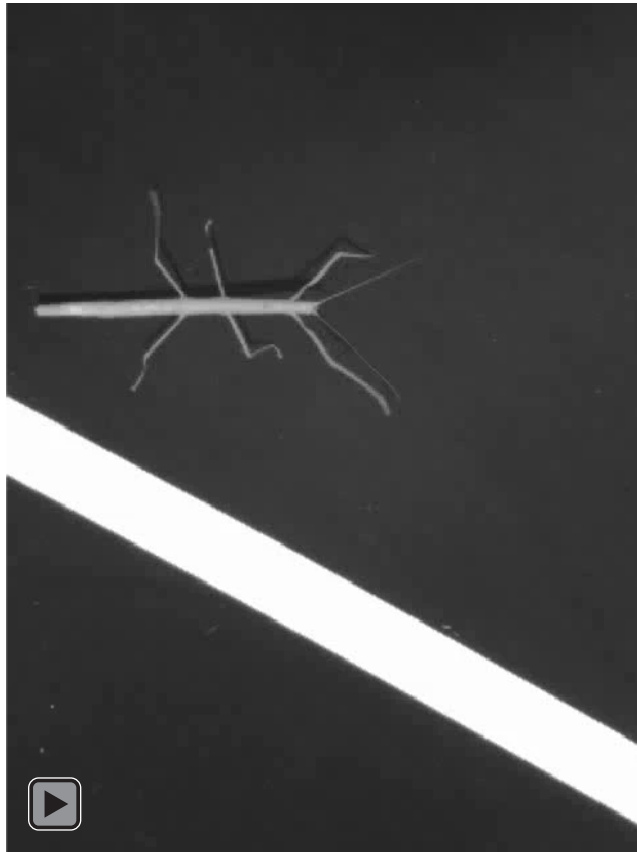

**Movie 3.** An example of an intact adult stick insect walking in an irregular gait.

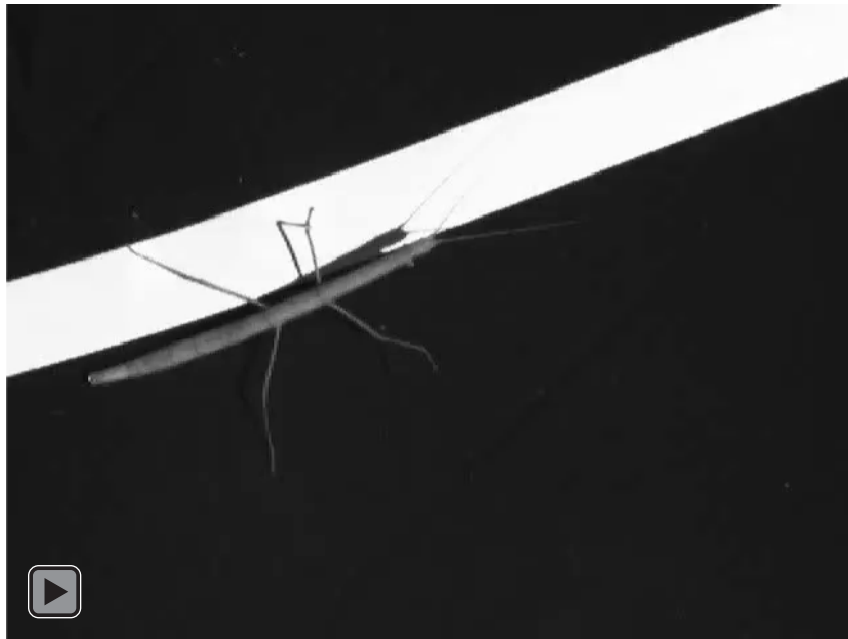

**Movie 4.** An example of an intact adult stick insect walking with amputated front legs.

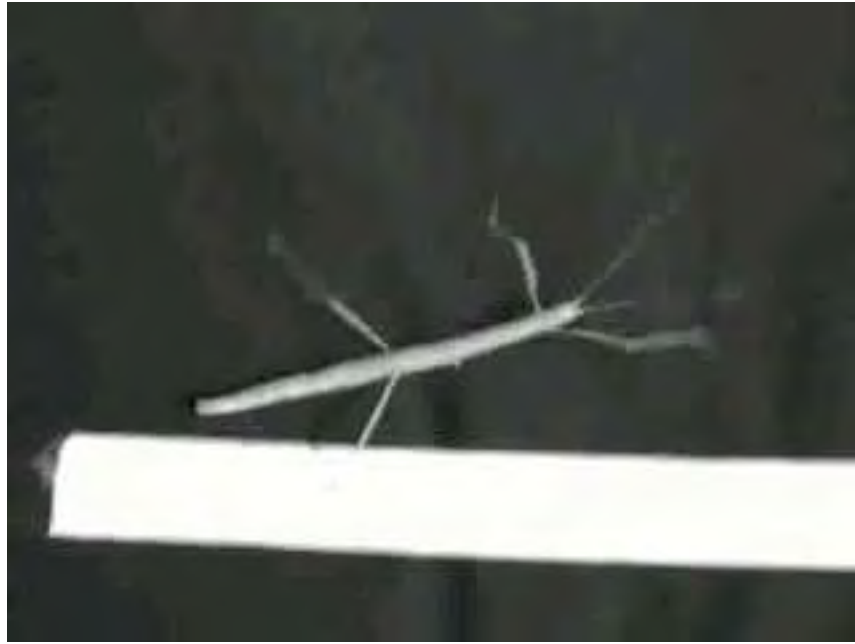

**Movie 5.** An example of an intact adult stick insect walking with amputated middle legs.

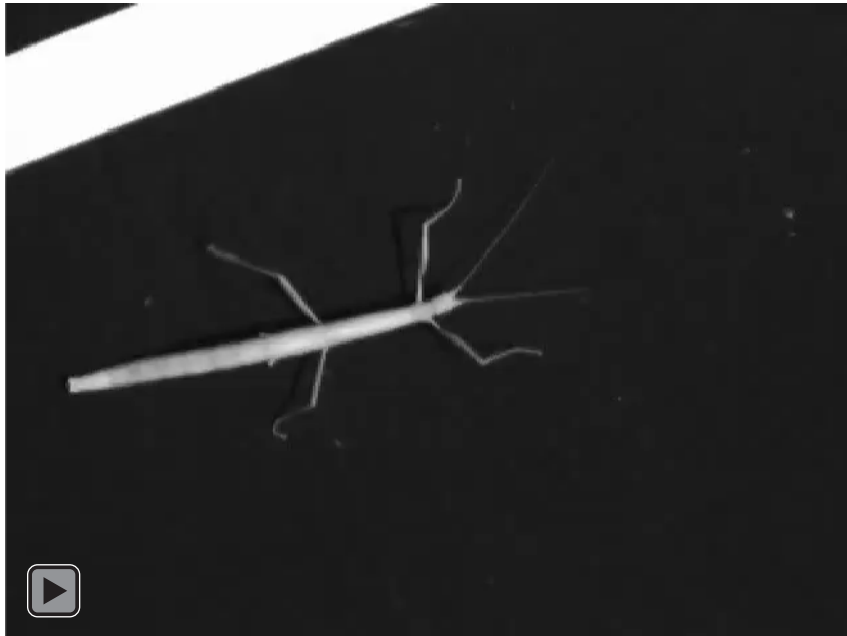

**Movie 6.** An example of an intact adult stick insect walking with amputated hindlegs.
